# Supplementary material
Source: Springer Nature journal article supplement (https://www.springermedizin.de/resource/supplementary/12913_2010_1468_MOESM1_ESM.pdf/9528204)
Supplement: MOESM1 [file 9528204]

The Full Council

Council Health Services Board

Vertical Programmes

Council Health Management Team

District Hospital

Health Centres

Dispensaries

Communities
